# Supplementary material
Source: PubMed Central journal article supplement (PMC5256604)
Supplement: 12248_2016_9885_MOESM1_ESM.pdf [file 12248_2016_9885_MOESM1_ESM.pdf]

## Correlation plot of experimentally determined *n*-octanol/water partition coefficient (Log*P*) and predicted (cLog*P*)

Experimentally determined Log*P* were plotted against cLog*P* values for 35 drugs. The dotted lines represent the boundaries of the 95% CI and R<sup>2</sup> represents the goodness of fit. Correlation is shown in **Supplementary Figure 1**.

### Benchmark Reference Drug Molecule

Metoprolol was used in previous studies as a benchmark reference compound for permeability because it is known that 95% of the drug is absorbed from the GI tract mainly by passive diffusion (1, 2). Similarly in this study, metoprolol was chosen as the benchmark reference compound for high/low permeability. Drugs with cLog*P* values similar or above the cLog*P* value of metoprolol (1.8) were classified as high permeability class drugs, whereas, drugs with cLog*P* values less than that of metoprolol were classified as low permeability class drugs. Permeability classification is presented in **Supplementary Table 1**.

**Supplementary Table 1: Permeability classification of the 38 drugs used in the study**

| Drug               | cLog <i>P</i> | Permeability class |
|--------------------|---------------|--------------------|
| Albendazole        | 3.22          | High               |
| Amitriptyline      | 5.1           | High               |
| Amoxicillin        | 0.75          | Low                |
| Azithromycin       | 3.03          | High               |
| Carbamazepine      | 2.1           | High               |
| Cefalexin          | 0.55          | Low                |
| Chloramphenicol    | 1.15          | Low                |
| Ciprofloxacin      | -0.57         | Low                |
| Clindamycin        | 1.76          | Low                |
| Cloxacillin        | 2.61          | High               |
| Cyclizine          | 3.55          | High               |
| Dexamethasone      | 1.93          | High               |
| Diazepam           | 2.63          | High               |
| Diethylcarbamazine | 0.9           | Low                |
| Doxycycline        | -0.72         | Low                |
| Erythromycin       | 2.37          | High               |
| Ethosuximide       | 0.1           | Low                |
| Fluoxetine HCl     | 4.09          | High               |
| Ibuprofen          | 3.5           | High               |
| Ivermectin         | 5.83          | High               |
| Levamisole HCl     | 2.2           | High               |
| Loratadine         | 4.8           | High               |
| Mebendazole        | 2.95          | High               |
| Metronidazole      | -0.15         | Low                |
| Midazolam          | 3.89          | High               |

| <b>Drug</b>             | <b>cLogP</b> | <b>Permeability class</b> |
|-------------------------|--------------|---------------------------|
| Morphine                | 0.99         | Low                       |
| Niclosamide             | 4.49         | High                      |
| Nitrofurantoin          | 0.03         | Low                       |
| Oxamniquine             | 1.54         | Low                       |
| Paracetamol             | 0.51         | Low                       |
| Phenobarbital           | 1.4          | Low                       |
| Phenoxymethylpenicillin | 1.78         | Low                       |
| Phenytoin               | 2.26         | High                      |
| Praziquantel            | 2.42         | High                      |
| Prednisolone            | 1.66         | Low                       |
| Sulfamethoxazole        | 0.79         | Low                       |
| Trimethoprim            | 1.26         | Low                       |
| Valproic acid           | 2.54         | High                      |

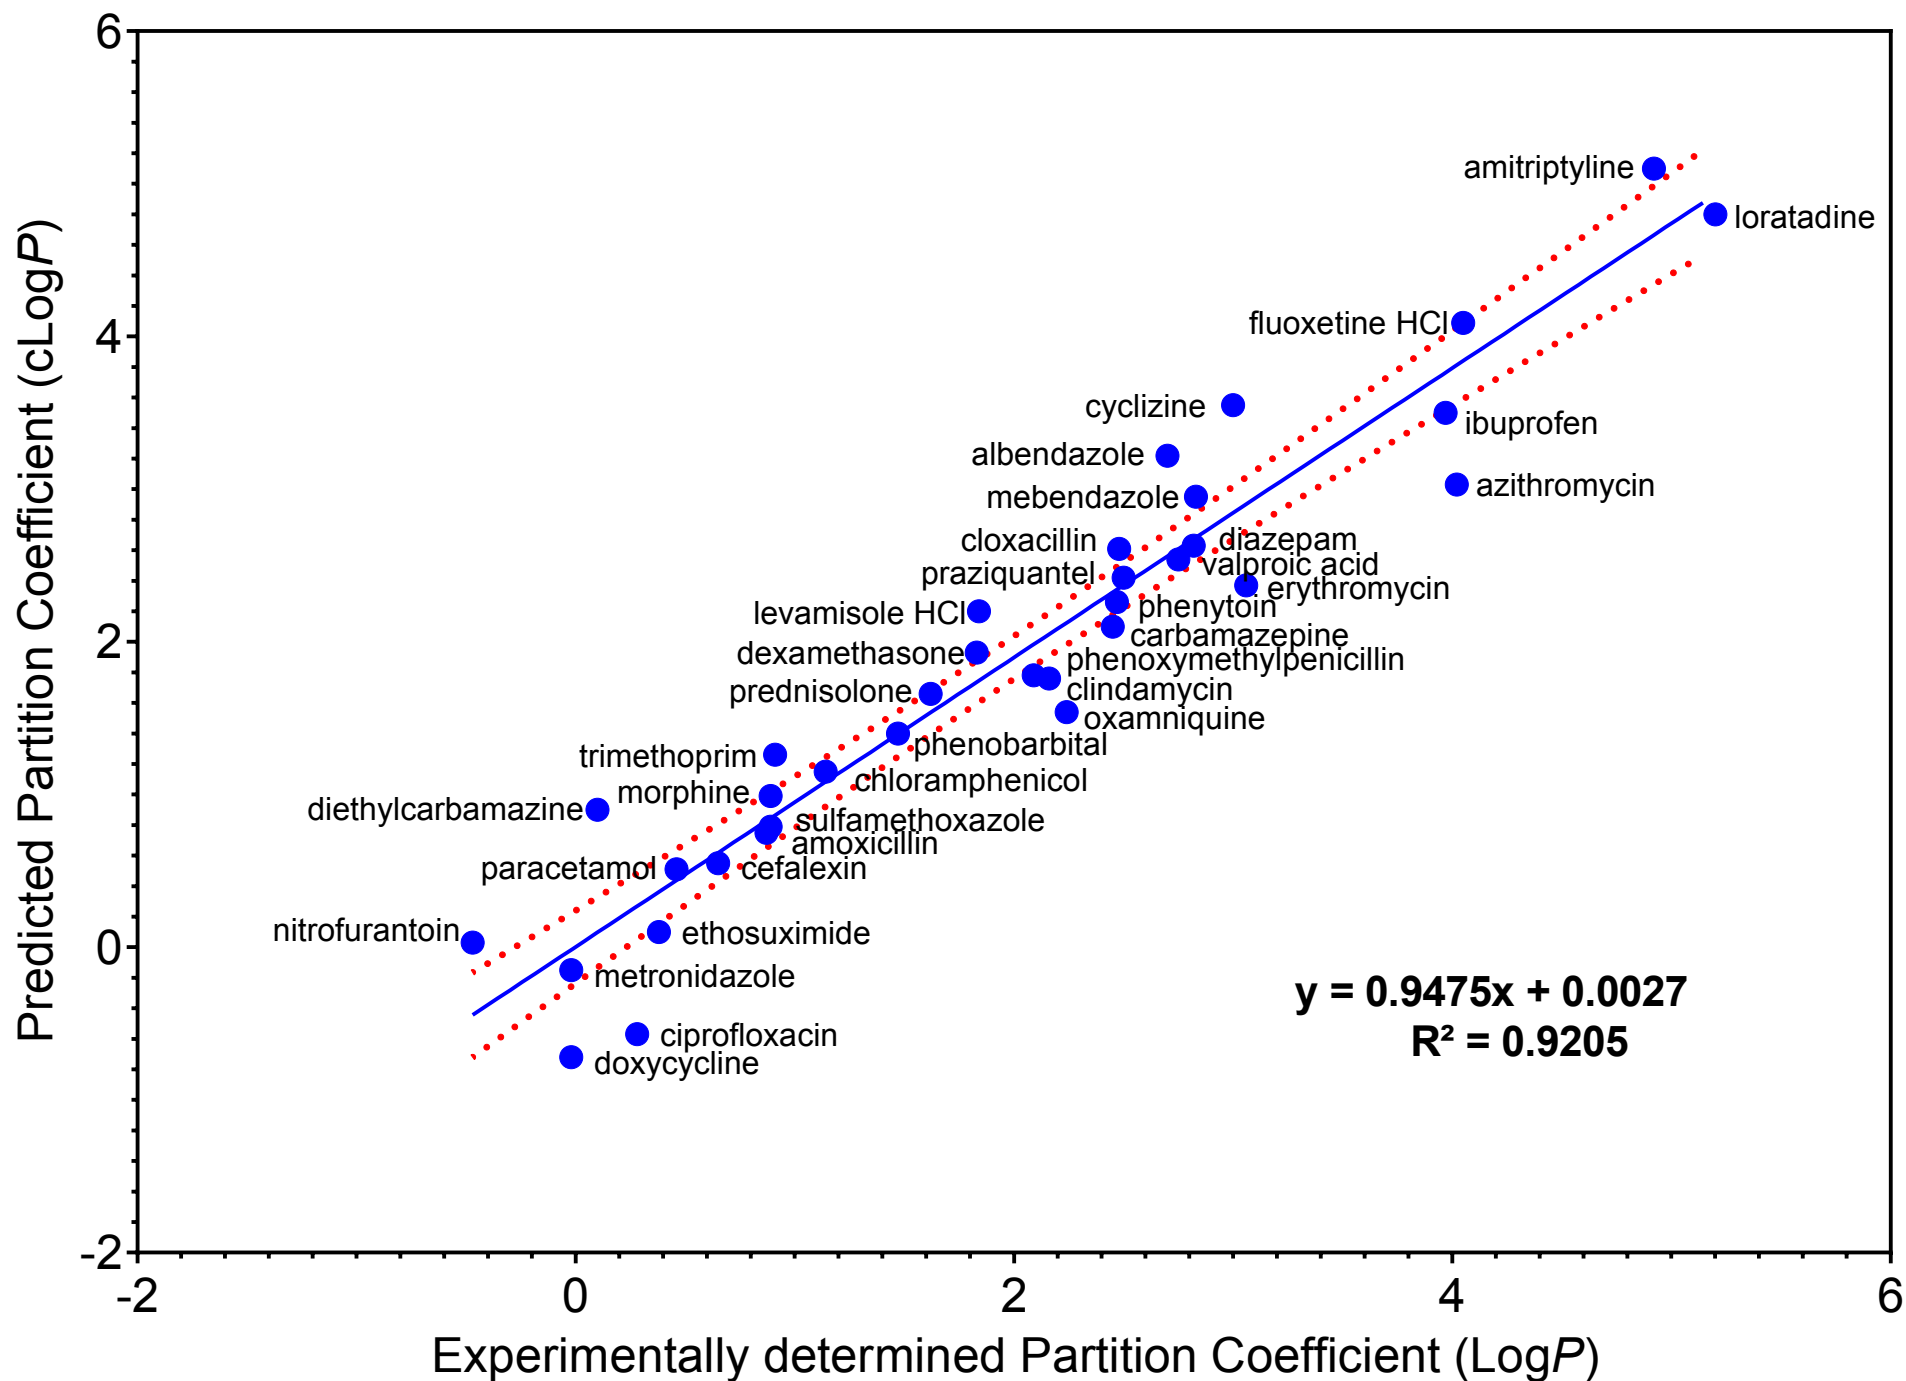

**Supplementary Figure 1:** Correlation plot of experimentally determined n-octanol/water partition coefficient (LogP) and predicted (cLogP) values for 35 drugs. The dotted lines represent the boundaries of the 95% CI and  $R^2$  represents the goodness of fit.

### Solubility percent change to cause a shift in the solubility class

Taking a conservative approach in using the BCS-based biowaiver principles, more risk is considered when the solubility class of a drug shifts from high to low than *vice versa*. According to the BCS principles, drugs with a dose number ( $D_0$ )  $\leq 1$  are classified as high solubility class drugs and, conversely, drugs with a  $D_0 > 1$  are classified as low solubility class drugs. The  $D_0$  is a function of the drug's maximal dose strength ( $M_0$ ), saturated solubility ( $C_s$ ) and initial gastric volume ( $V_0$ ). To account for possible discrepancies in solubility of drugs in pediatric subpopulations, percentages above which experimental solubility used in this study might change to cause a shift in the solubility class from high to low (i.e. to bring the  $D_0$  of a drug above 1) were calculated using supplementary equation 1.

$$\% \text{ change in solubility} = 1 - D_0 \quad (\text{Supplementary equation 1})$$

Supplementary Table 2 displays percent changes (reduction) in solubility above which a shift in the solubility class from high to low in pediatric subpopulations would be expected. For example, when the experimental solubility of amoxicillin would decrease by more than 5%, the low solubility class designated in 12 years child would shift from high to low.

**Supplementary Table 2: Solubility percent change above which a shift in the solubility class for high solubility drugs in pediatric subpopulations would be expected**

| Drug               | Percent change                |             |      |      |      |      |        |                               |      |      |      |      |      |                               |      |      |      |      |      |
|--------------------|-------------------------------|-------------|------|------|------|------|--------|-------------------------------|------|------|------|------|------|-------------------------------|------|------|------|------|------|
|                    | Newborn (neonate)             | Age (years) |      |      |      |      |        |                               |      |      |      |      |      |                               |      |      |      |      |      |
|                    |                               | 0.5         | 1    | 2    | 3    | 4    | 5      | 6                             | 7    | 8    | 9    | 10   | 11   | 12                            | 13   | 14   | 15   | 16   | 17   |
| Amoxicillin        | The drug shows low solubility |             |      |      |      |      |        |                               |      |      |      |      | 0.05 | 0.15                          | 0.24 | 0.31 | 0.37 | 0.41 |      |
| Cefalexin          | The drug shows low solubility |             |      |      |      |      | 0.0009 | The drug shows low solubility |      |      |      |      |      | 0.09                          | 0.19 | 0.27 | 0.34 | 0.39 | 0.43 |
| Chloramphenicol    | The drug shows low solubility |             |      |      |      |      |        |                               |      |      | 0.09 | 0.17 | 0.26 | 0.35                          | 0.42 | 0.48 | 0.53 | 0.57 | 0.59 |
| Ciprofloxacin      | 0.87                          | 0.82        | 0.79 | 0.83 | 0.85 | 0.86 | 0.88   | 0.89                          | 0.90 | 0.92 | 0.92 | 0.93 | 0.94 | 0.95                          | 0.95 | 0.96 | 0.96 | 0.96 | 0.97 |
| Cyclizine          | 0.74                          | 0.74        | 0.74 | 0.74 | 0.74 | 0.74 | 0.74   | 0.74                          | 0.74 | 0.75 | 0.77 | 0.79 | 0.82 | 0.67                          | 0.71 | 0.74 | 0.76 | 0.78 | 0.80 |
| Dexamethasone      | 0.01                          | 0.25        | 0.42 | 0.53 | 0.58 | 0.63 | 0.68   | 0.72                          | 0.74 | 0.77 | 0.79 | 0.81 | 0.83 | 0.85                          | 0.87 | 0.88 | 0.89 | 0.90 | 0.91 |
| Diazepam           | The drug shows low solubility |             |      |      |      |      |        |                               |      |      | 0.09 | 0.17 | 0.26 | The drug shows low solubility |      |      | 0.05 | 0.13 | 0.18 |
| Diethylcarbamazine | 0.89                          | 0.95        | 0.96 | 0.97 | 0.97 | 0.97 | 0.98   | 0.98                          | 0.98 | 0.98 | 0.99 | 0.99 | 0.99 | 0.99                          | 0.99 | 0.99 | 0.99 | 0.99 | 0.99 |
| Ethosuximide       | 0.86                          | 0.86        | 0.84 | 0.87 | 0.88 | 0.89 | 0.91   | 0.92                          | 0.93 | 0.93 | 0.94 | 0.95 | 0.95 | 0.96                          | 0.96 | 0.97 | 0.97 | 0.97 | 0.97 |

| Drug                   | Percent change                |             |       |       |       |       |       |       |       |       |       |       |       |       |       |       |       |       |       |       |
|------------------------|-------------------------------|-------------|-------|-------|-------|-------|-------|-------|-------|-------|-------|-------|-------|-------|-------|-------|-------|-------|-------|-------|
|                        | Newborn (neonate)             | Age (years) |       |       |       |       |       |       |       |       |       |       |       |       |       |       |       |       |       |       |
|                        |                               | 0.5         | 1     | 2     | 3     | 4     | 5     | 6     | 7     | 8     | 9     | 10    | 11    | 12    | 13    | 14    | 15    | 16    | 17    |       |
| Fluoxetine HCl         | The drug shows low solubility |             |       |       |       |       |       |       |       |       | 0.996 | 0.997 | 0.997 | 0.997 | 0.998 | 0.998 | 0.998 | 0.998 | 0.998 | 0.998 |
| Levamisole HCl         | 0.952                         | 0.976       | 0.982 | 0.985 | 0.987 | 0.988 | 0.990 | 0.991 | 0.992 | 0.993 | 0.993 | 0.994 | 0.995 | 0.995 | 0.996 | 0.996 | 0.997 | 0.997 | 0.997 |       |
| Metronidazole          | 0.79                          | 0.79        | 0.79  | 0.12  | 0.22  | 0.30  | 0.40  | 0.47  | 0.51  | 0.57  | 0.62  | 0.65  | 0.69  | 0.72  | 0.75  | 0.78  | 0.80  | 0.82  | 0.83  |       |
| Morphine               | 0.82                          | 0.64        | 0.64  | 0.64  | 0.64  | 0.64  | 0.64  | 0.64  | 0.64  | 0.64  | 0.64  | 0.44  | 0.51  | 0.56  | 0.61  | 0.65  | 0.68  | 0.71  | 0.73  |       |
| Paracetamol            | 0.42                          | 0.71        | 0.78  | 0.73  | 0.76  | 0.79  | 0.75  | 0.78  | 0.79  | 0.82  | 0.67  | 0.70  | 0.74  | 0.77  | 0.79  | 0.81  | 0.83  | 0.84  | 0.85  |       |
| Phenobarbital          | The drug shows low solubility |             |       |       |       |       |       |       |       |       | 0.08  | 0.18  | 0.25  | 0.34  | 0.41  | 0.48  | 0.53  | 0.57  | 0.61  | 0.63  |
| Phenoxyethylpenicillin | 0.58                          | 0.79        | 0.68  | 0.74  | 0.77  | 0.79  | 0.82  | 0.84  | 0.71  | 0.75  | 0.77  | 0.79  | 0.82  | 0.84  | 0.85  | 0.87  | 0.88  | 0.89  | 0.90  |       |
| Prednisolone           | The drug shows low solubility |             |       |       |       |       |       |       |       |       | 0.07  | 0.17  | 0.27  | 0.35  | 0.42  | 0.47  | 0.51  | 0.54  |       |       |
| Trimethoprim           | The drug shows low solubility |             |       |       |       |       |       |       |       |       |       |       |       |       |       | 0.05  | 0.13  | 0.18  |       |       |

## REFERENCES

1. Shawahna R, Rahman N. Evaluation of the use of partition coefficients and molecular surface properties as predictors of drug absorption: a provisional biopharmaceutical classification of the list of national essential medicines of Pakistan. *Daru*. 2011;19(2):83-99.
2. Kasim NA, Whitehouse M, Ramachandran C, Bermejo M, Lennernäs H, Hussain AS, et al. Molecular properties of WHO essential drugs and provisional biopharmaceutical classification. *Mol Pharm*. 2004;1(1):85-96.
